# Supplementary material for: Synthesis and self-assembly of Cu1.94S–ZnS heterostructured nanorods
Source: Royal Society of Chemistry journal article supplement (doi:10.1039/c0ce00026d), 2010-01-01
Supplement: c0ce00026d.pdf [file c0ce00026d.pdf]

## Electronic Supplementary information

### Synthesis and Self-assembly of $\text{Cu}_{1.94}\text{S}$ -ZnS Heterostructured Nanorods

Luoxin Yi,<sup>a</sup> Aiwei Tang,<sup>b</sup> Mu Niu,<sup>a</sup> Wei Han,<sup>a</sup> Yanbing Hou,<sup>b</sup> and Mingyuan Gao\*<sup>a</sup>

<sup>a</sup>*Institute of Chemistry, CAS, Bei Yi Jie 2, Zhong Guan Cun, 100190, Beijing;*

<sup>b</sup>*Key Laboratory of Luminescence and Optical Information ( Ministry of Education), Institute of Optoelectronic Technology, Beijing JiaoTong University, 100044 Beijing*

**Synthetic procedures for  $\text{Cu}_{1.94}\text{S}$ -ZnS nanorods.** Scheme S1 shows the detailed synthetic procedures for *F-R-T* series of  $\text{Cu}_{1.94}\text{S}$ -ZnS nanorods prepared by introducing  $\text{Zn}(\text{acac})_2$ -dodecanethiol solution into reaction systems containing differently sized  $\text{Cu}_{1.94}\text{S}$  nanocrystals, as well as the control experiment performed by simultaneously pyrolyzing  $\text{Cu}(\text{acac})_2$  and  $\text{Zn}(\text{acac})_2$  in dodecanethiol.

**Identification of the crystalline phases by SAED.** The crystalline phase of copper sulfide and copper zinc sulfide nanocrystals were determined by selected SAED apart from X-ray diffraction method. Detailed results are provided in Figure S1.

**Atomic arrangements crossing the  $\text{Cu}_{1.94}\text{S}/\text{ZnS}$  interface.** According to the high resolution TEM results shown in Figures 1f-g, a schematic model for illustrating the atomic arrangements crossing the  $\text{Cu}_{1.94}\text{S}$ -ZnS interface is given in Figure S2.

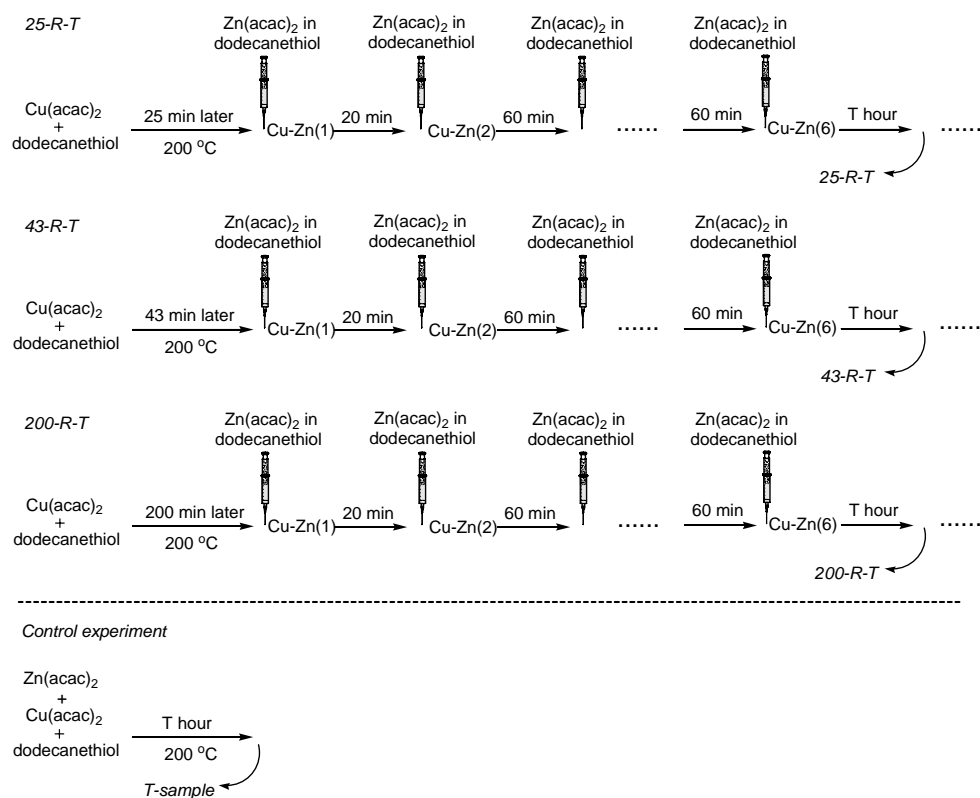

Scheme S1. Synthetic procedures for 25-R-T, 43-R-T, 200-R-T, and control experiment, respectively.

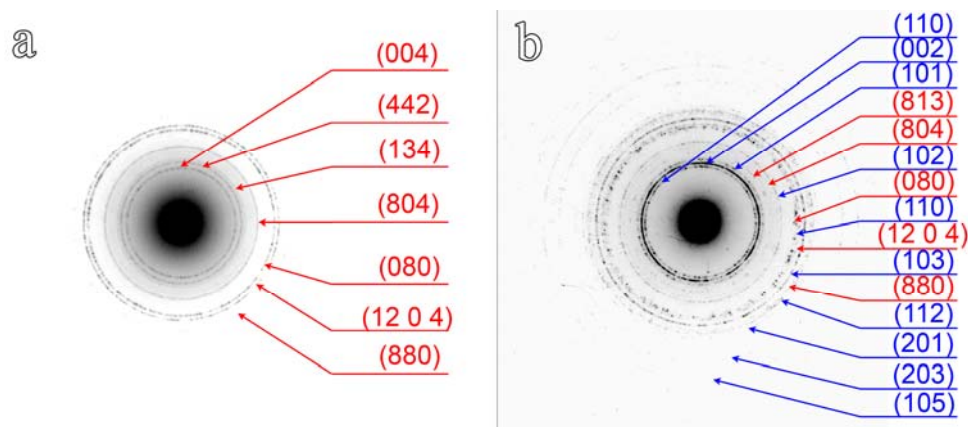

Figure S1. SAED patterns of copper sulfide nanoparticles obtained after pyrolyzing  $\text{Cu}(\text{acac})_2$  in dodecanethiol at  $200\text{ }^\circ\text{C}$  for 25 min (a), and sample 25-1-17 (b), together with the identification of diffraction rings labeled with the Miller indices of monoclinic  $\text{Cu}_{1.94}\text{S}$  (red, JCPDS No.23-0959) and wurtzite  $\text{ZnS}$  (blue, JCPDS No. 79-2204).

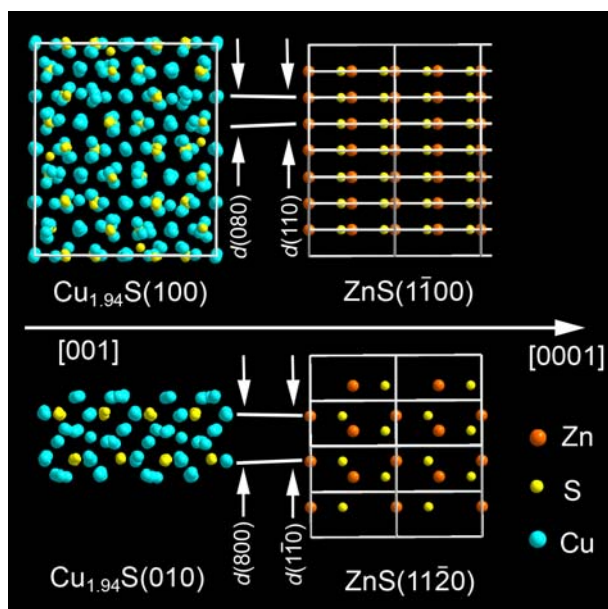

Figure S2. Schematic model for the atomic arrangements at the  $\text{Cu}_{1.94}\text{S}$ - $\text{ZnS}$  interface.
